# Supplementary material for: Pancancer Analyses Reveal Genomics and Clinical Characteristics of the SETDB1 in Human Tumors
Source: Hindawi journal article supplement (doi:10.1155/2022/6115878), 2022-05-23
Supplement: f1 [file 6115878.f1.zip]

A

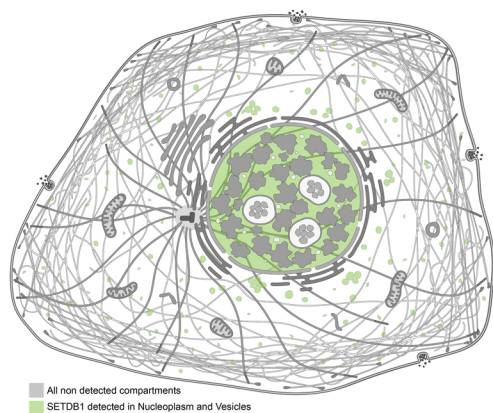

C

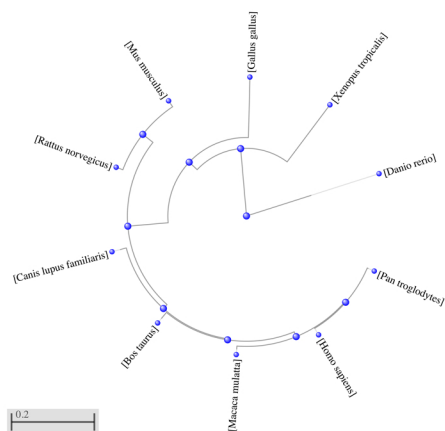

B

NCBI Multiple Sequence Alignment Viewer, Version 1.21.0

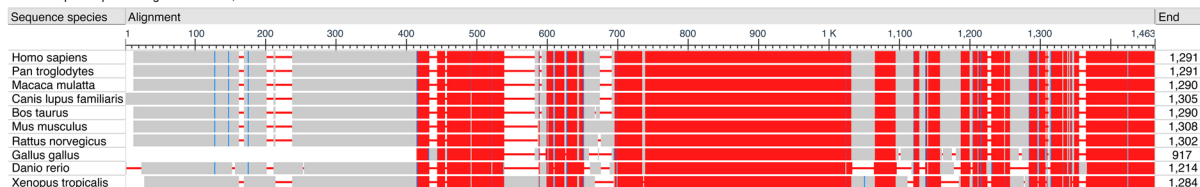

D

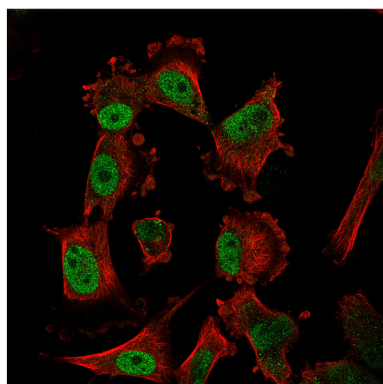

U-251 MG HPA058484  
Location: Nucleoplasm

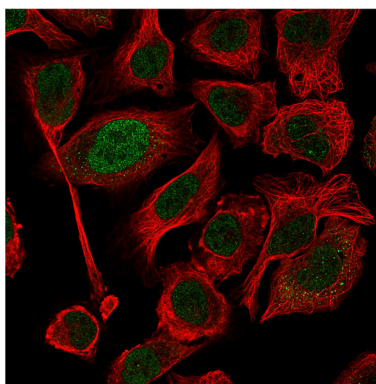

U-2 OS HPA058484  
Location: Nucleoplasm, Vesicles

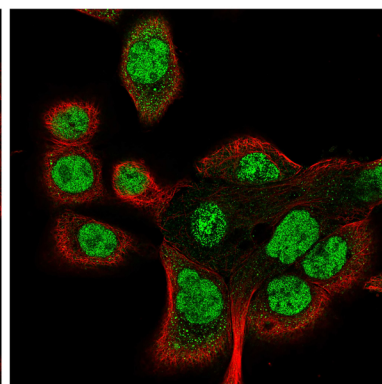

A-431 HPA058484  
Location: Nucleoplasm

Microtubules

Target protein
