# Supplementary material for: Pancancer Analyses Reveal Genomics and Clinical Characteristics of the SETDB1 in Human Tumors
Source: Hindawi journal article supplement (doi:10.1155/2022/6115878), 2022-05-23

# Networks

- Physical Interactions
- Co-expression
- Shared protein domains
- Predicted
- Genetic Interactions
- Co-localization

## Functions

- chromatin assembly
- chromatin assembly or disassembly
- DNA packaging
- DNA conformation change
- protein-DNA complex
- nucleosome organization
- DNA packaging complex

A

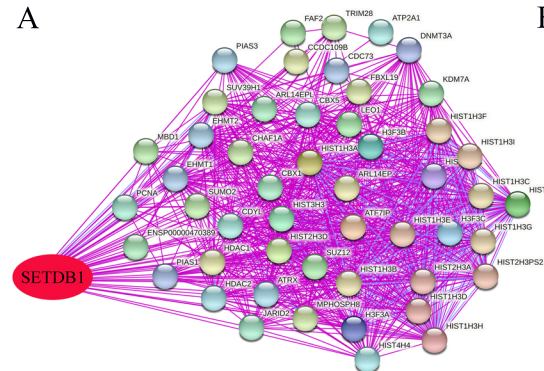

B

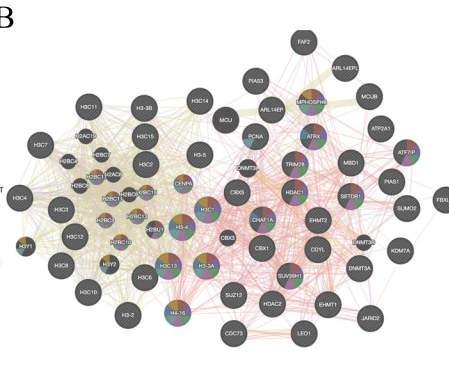

C

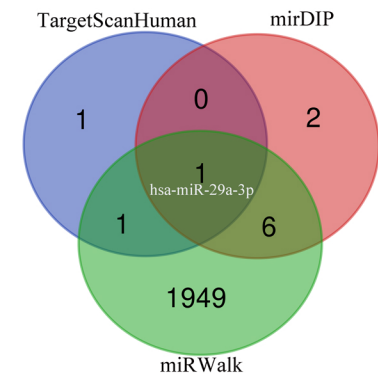

D

SETDB1 5' ...UGAUCCCUUCCAAUGUGGUGCUA... 3'

hsa-miR-29a-3p 3' AUUGGCUAAAGUCUACCACGAU 5'

E

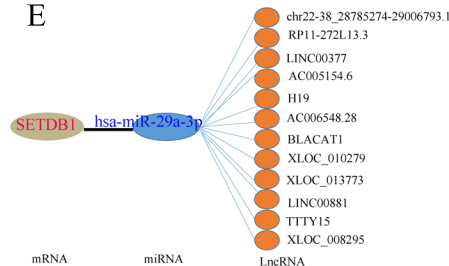

Supplement: f1 [file 6115878.f1.zip]
