# Supplementary figures and images for: Pancancer Analyses Reveal Genomics and Clinical Characteristics of the SETDB1 in Human Tumors
Source: Hindawi journal article supplement (doi:10.1155/2022/6115878), 2022-05-23

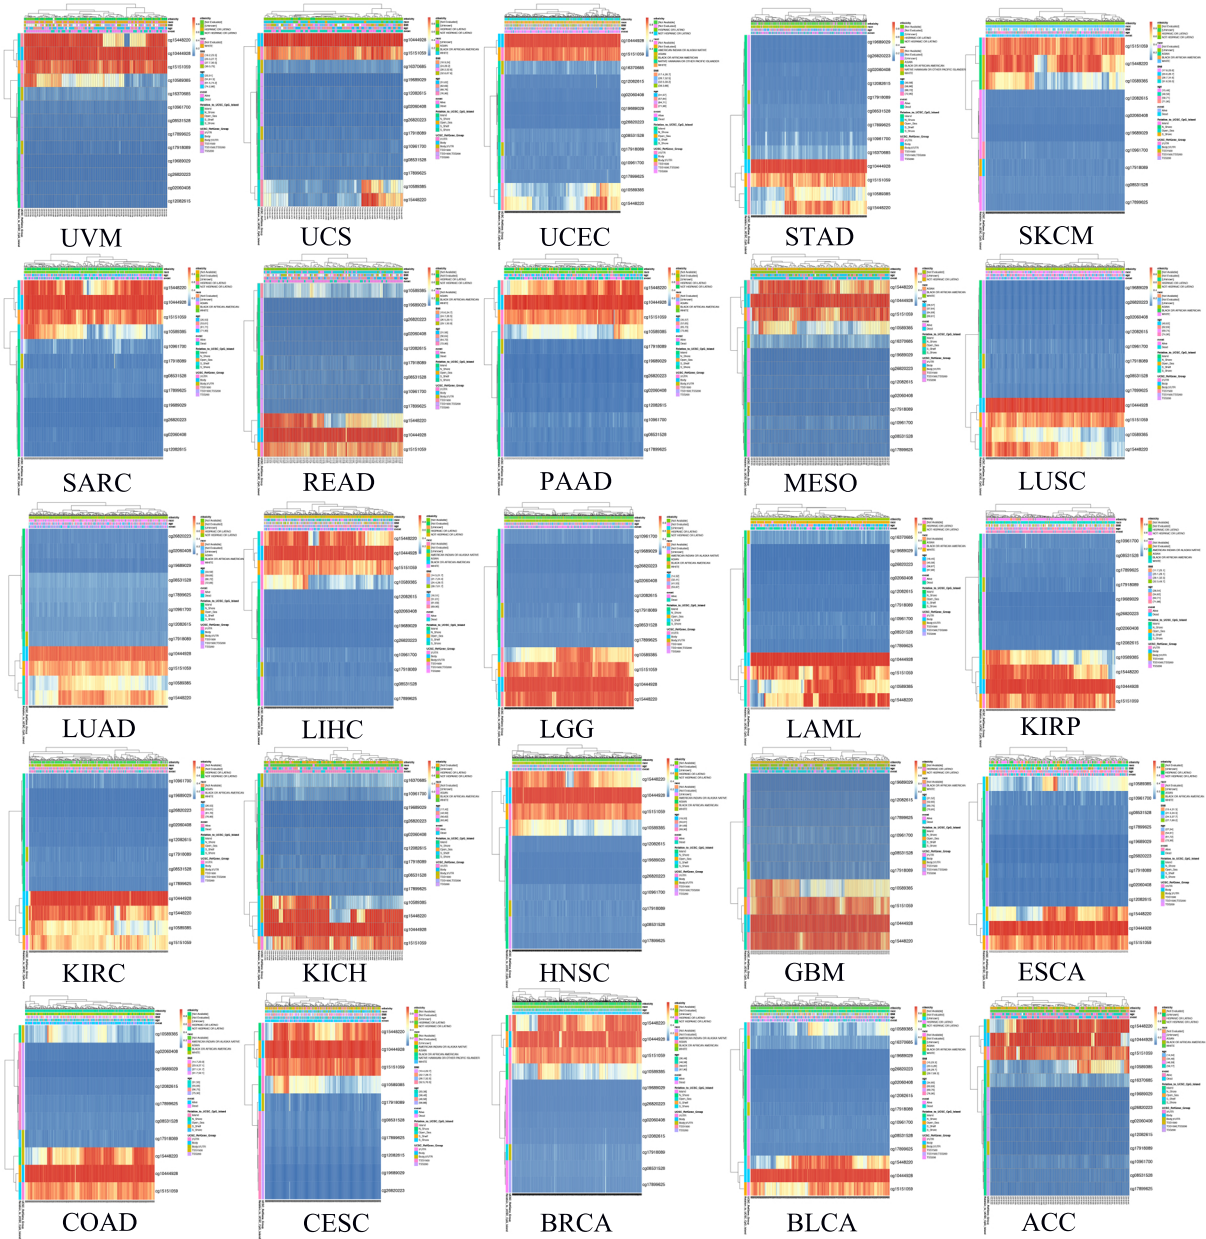

Supplement: f1 [file 6115878.f1.zip]

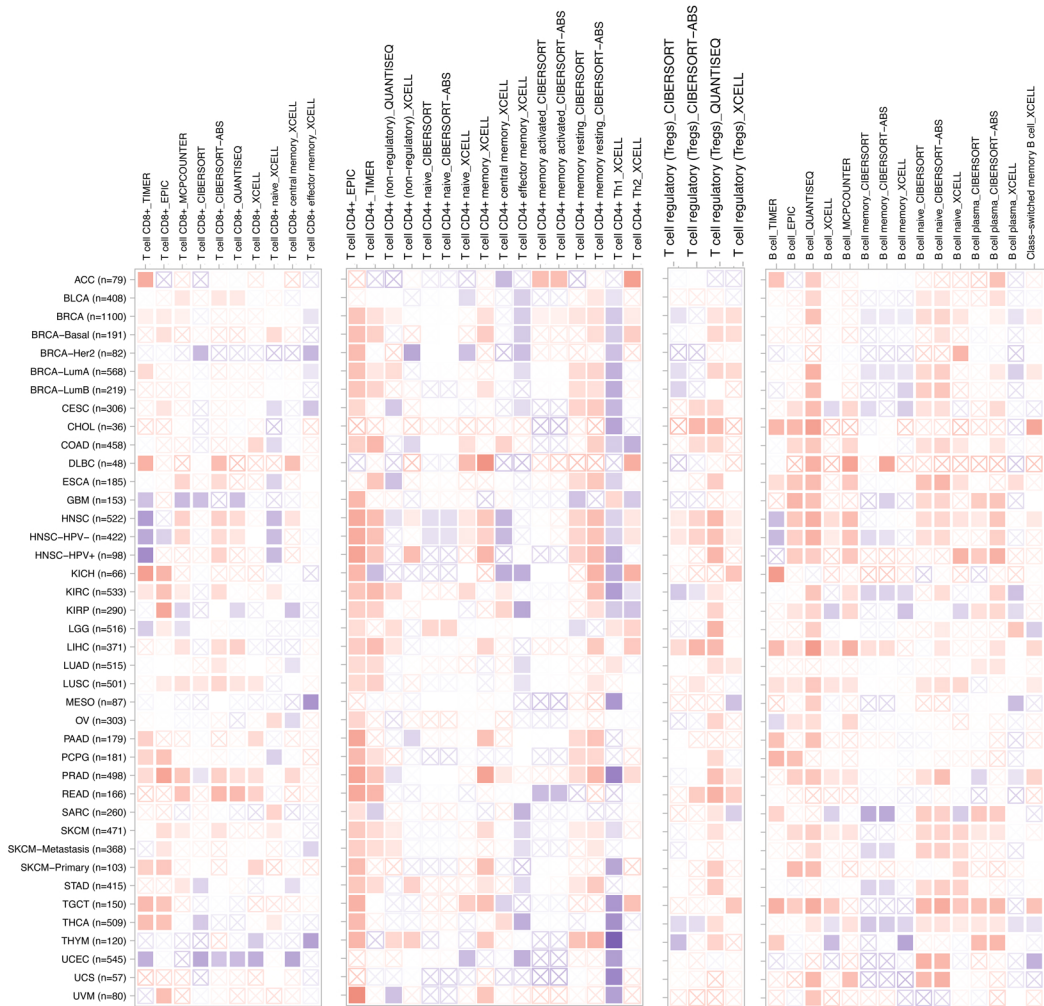

Supplement: f1 [file 6115878.f1.zip]

# A Data from TCGA+GTEX

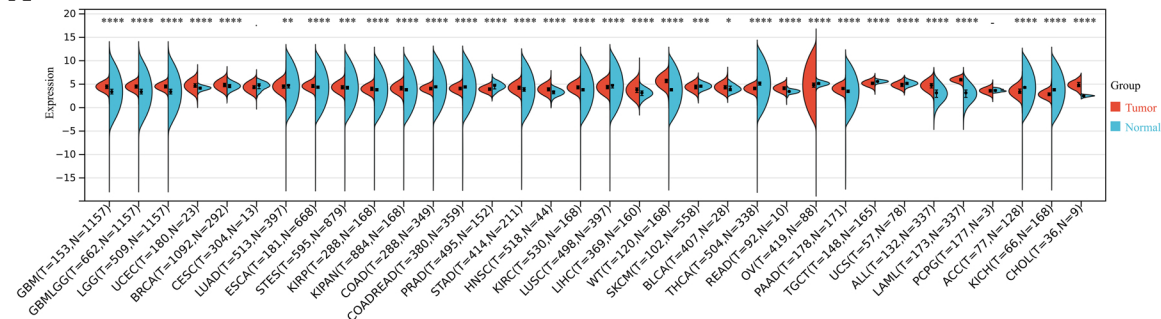

## B Data from TCGA

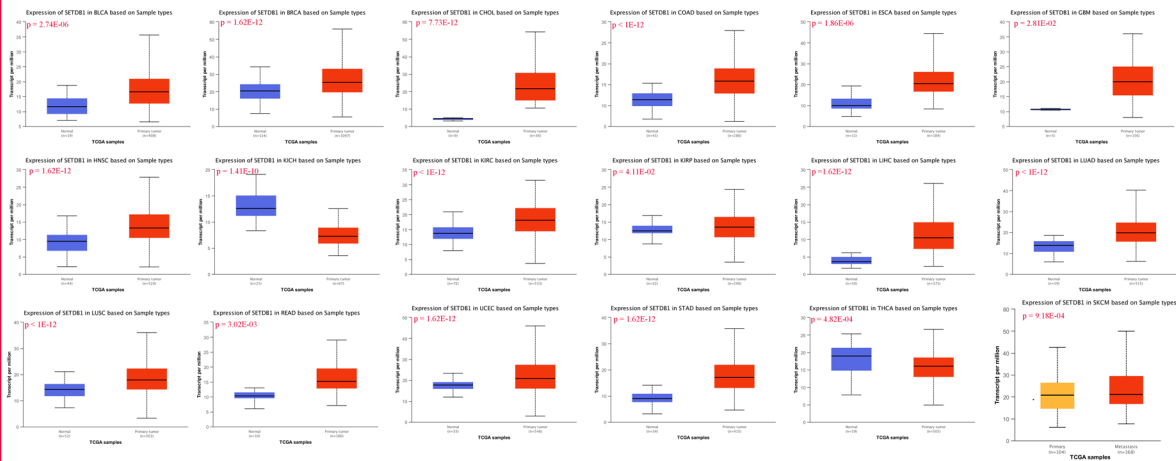

Supplement: f1 [file 6115878.f1.zip]

## Normal

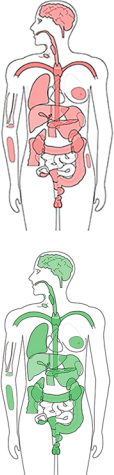

**RNA single cell type specificity:** Low cell type specificity

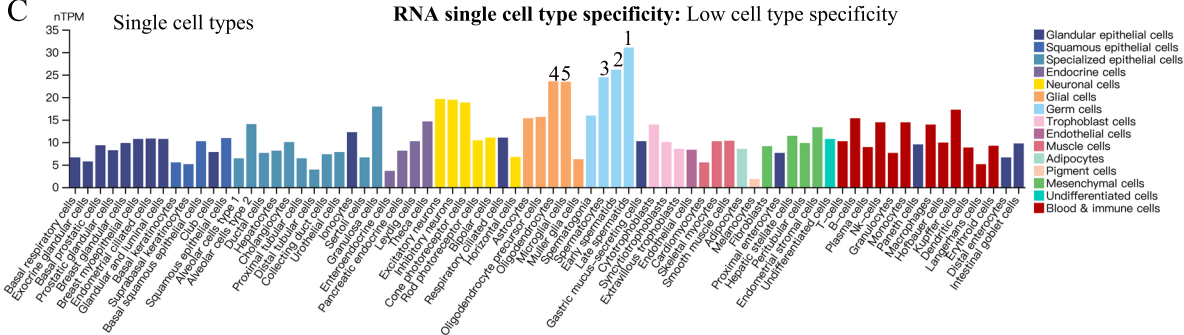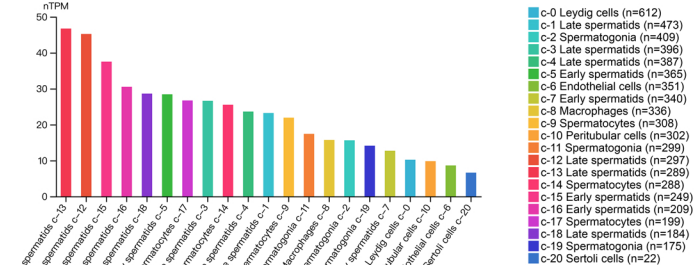

Supplement: f1 [file 6115878.f1.zip]
